# Supplementary material for: Folate-decorated redox/pH dual-responsive degradable prodrug micelles for tumor triggered targeted drug delivery
Source: Royal Society of Chemistry journal article supplement (doi:10.1039/c6ra11824k), 2016-01-01
Supplement: c6ra11824k1.pdf [file c6ra11824k1.pdf]

## Supplementary Data

### **Folate-decorated redox/pH dual-responsive degradable prodrug micelles for tumor triggered targeted drug delivery**

Seyed Jamal Tabatabaei Rezaei,<sup>\*,a</sup> Layla Sarbaz,<sup>a</sup> Hassan Niknejad<sup>b,c</sup>

<sup>a</sup> *Laboratory of novel drug delivery systems, Department of Chemistry, University of Zanjan, P.O. Box 45195-313, Zanjan, Iran*

<sup>b</sup> *Department of Tissue Engineering, School of Advanced Technologies in Medicine, Shahid Beheshti University of Medical Sciences, Tehran, Iran*

<sup>c</sup> *Nanomedicine and Tissue Engineering Research Center, Shahid Beheshti University of Medical Sciences, Tehran, Iran*

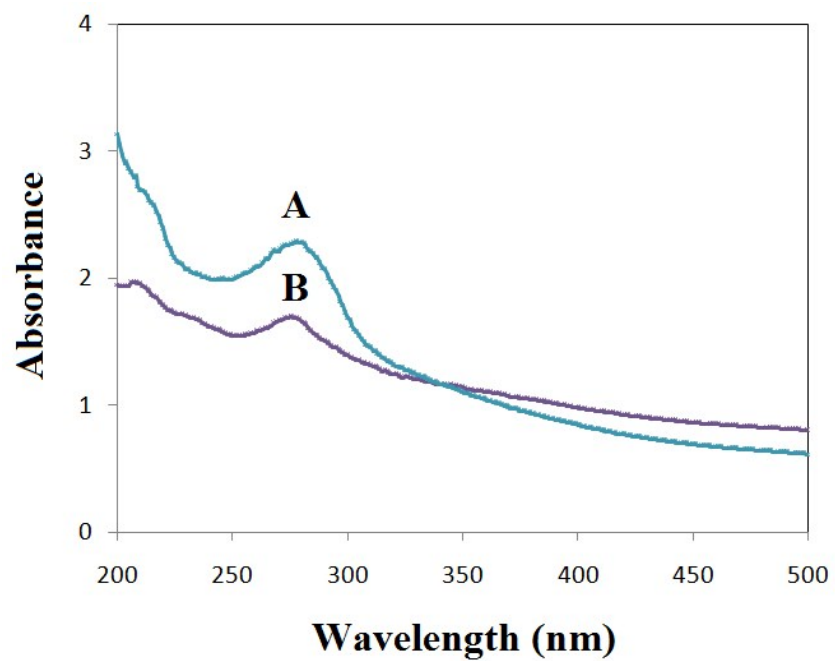

**Fig. S1.** UV-vis absorption spectra of: Free FA (A) and FA-PEG-*b*-P(TBACL-*co*-CL) (B).

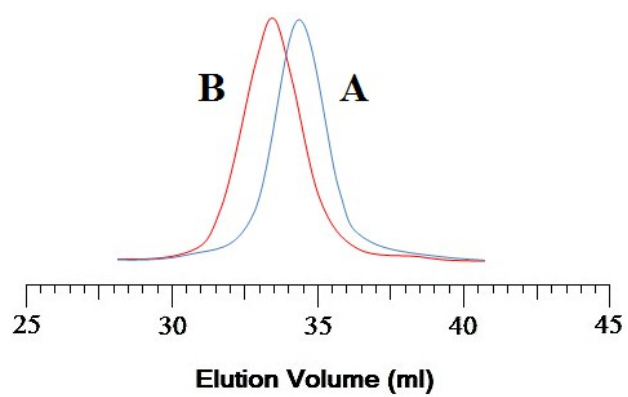

**Fig. S2.** GPC trace of polymers: FA-PEG-*b*-P(TBACL-*co*-CL) (A) and FA-PEG-*b*-P((PTX-SS-CL)-*co*-CL) (B).
